# Supplementary material for: A Cu–Pd single-atom alloy catalyst for highly efficient NO reduction
Source: Royal Society of Chemistry journal article supplement (doi:10.1039/c9sc03172c), 2019-01-01
Supplement: c9sc03172c1.pdf [file c9sc03172c1.pdf]

## Supporting Information

### Cu–Pd Single-Atom Alloy Catalyst for Efficient NO reduction

Feilong Xing,<sup>†</sup> Jaewan Jeon,<sup>†</sup> Takashi Toyao,<sup>†,‡</sup>

Ken-ichi Shimizu,<sup>†,‡</sup> Shinya Furukawa,<sup>\*,†,‡</sup>

<sup>†</sup>*Institute for Catalysis, Hokkaido University, N-21, W-10, Sapporo 001-0021, Japan*

<sup>‡</sup>*Elements Strategy Initiative for Catalysts and Batteries,*

*Kyoto University, Katsura, Kyoto 615-8520, Japan*

*E-mail: furukawa@cat.hokudai.ac.jp,*

*Tel: +81-11-706-9162, Fax: +81-11-706-9163*

Table S1. Summary of EXAFS curve fitting for Pd-based catalysts.

| sample                                            | shell | N             | R(Å)            | $\Delta E$ (eV) | $\sigma^2(\text{\AA}^2)$ | R-factor |
|---------------------------------------------------|-------|---------------|-----------------|-----------------|--------------------------|----------|
| Pd black                                          | Pd–Pd | 12 (fix)      | $2.74 \pm 0.00$ | $6.1 \pm 0.3$   | 0.006                    | 0.002    |
| Pd/Al <sub>2</sub> O <sub>3</sub>                 | Pd–Pd | $8.1 \pm 0.7$ | $2.73 \pm 0.00$ | $4.7 \pm 0.6$   | 0.009                    | 0.010    |
| CuPd/Al <sub>2</sub> O <sub>3</sub>               | Pd–Cu | $4.6 \pm 0.6$ | $2.60 \pm 0.02$ | $4.7 \pm 2.5$   | 0.004                    | 0.004    |
|                                                   | Pd–Pd | $6.0 \pm 0.5$ | $2.65 \pm 0.01$ | $3.9 \pm 0.8$   | 0.009                    |          |
| Cu <sub>5</sub> Pd/Al <sub>2</sub> O <sub>3</sub> | Pd–Cu | $8.4 \pm 0.9$ | $2.57 \pm 0.01$ | $2.1 \pm 1.3$   | 0.007                    | 0.010    |

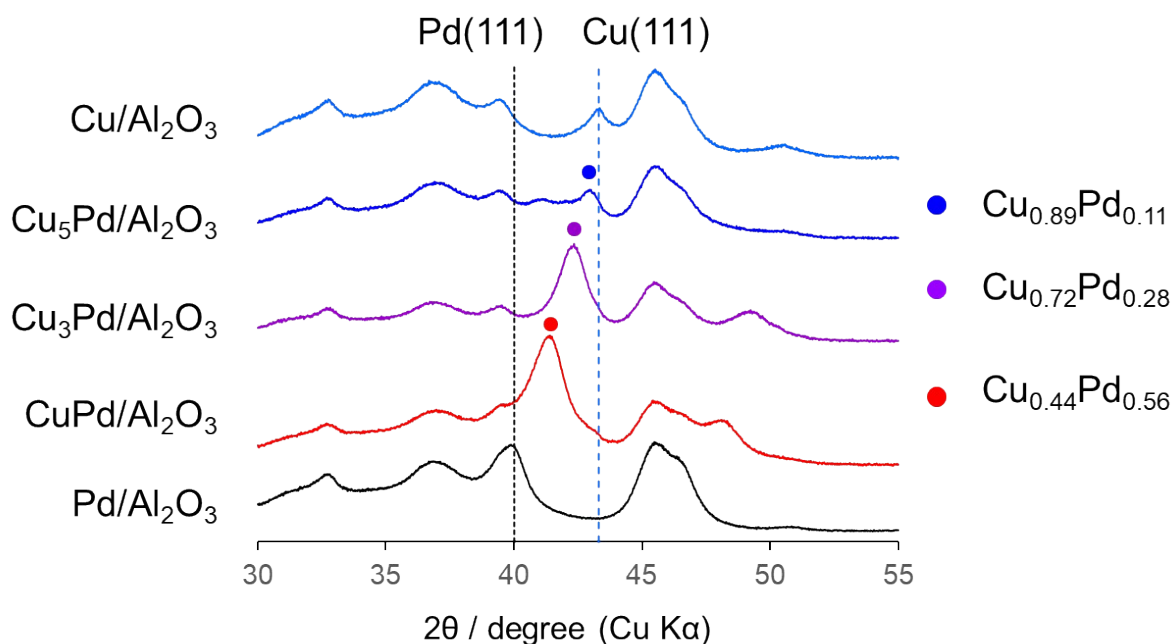

Figure S1. XRD patterns of Cu/Al<sub>2</sub>O<sub>3</sub>, Pd/Al<sub>2</sub>O<sub>3</sub>, and Cu–Pd/Al<sub>2</sub>O<sub>3</sub>. The Cu–Pd solid-solution alloy phases with bimetallic composition close to that of the fed ratio were formed: Cu/Pd = 1, Cu<sub>0.5</sub>Pd<sub>0.5</sub>; Cu/Pd = 3, Cu<sub>0.75</sub>Pd<sub>0.25</sub>; Cu/Pd = 5, Cu<sub>0.83</sub>Pd<sub>0.17</sub>. The diffraction peak intensity changes depending on the metal loadings as summarized Table 1.

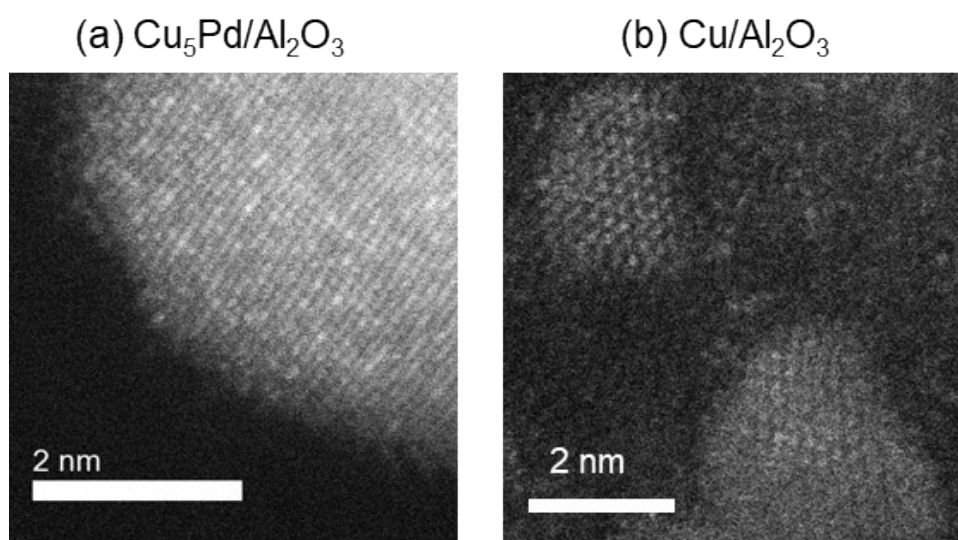

Figure S2. HAADF-STEM images of (a) Cu<sub>5</sub>Pd/Al<sub>2</sub>O<sub>3</sub> and (b) Cu/Al<sub>2</sub>O<sub>3</sub>.

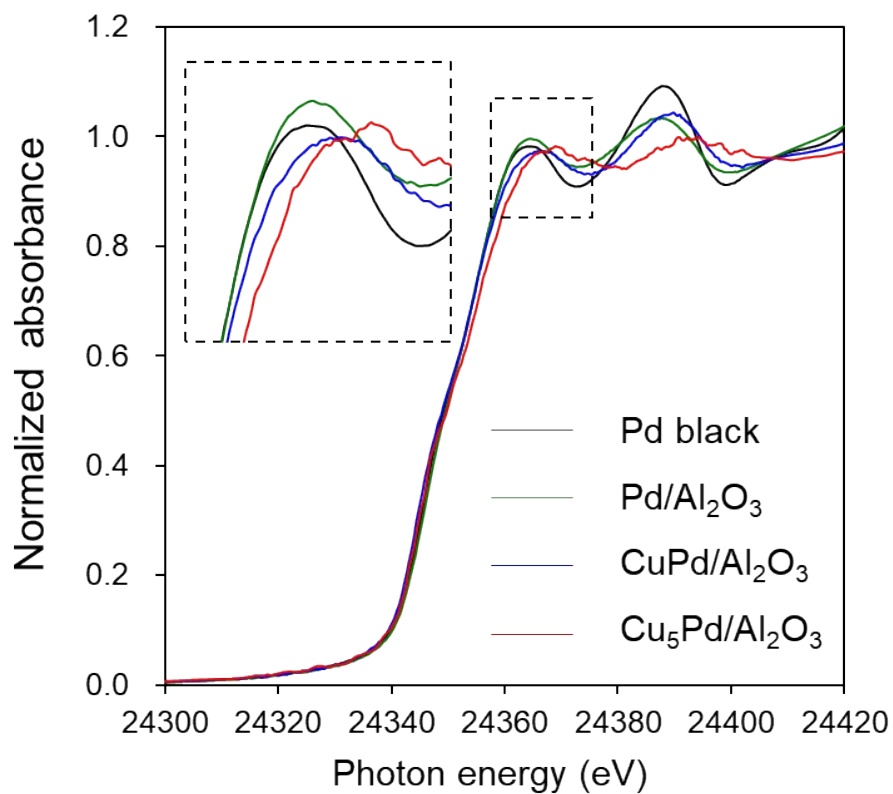

Figure S3. Pd K-edge XANES spectra of Pd-based catalysts.

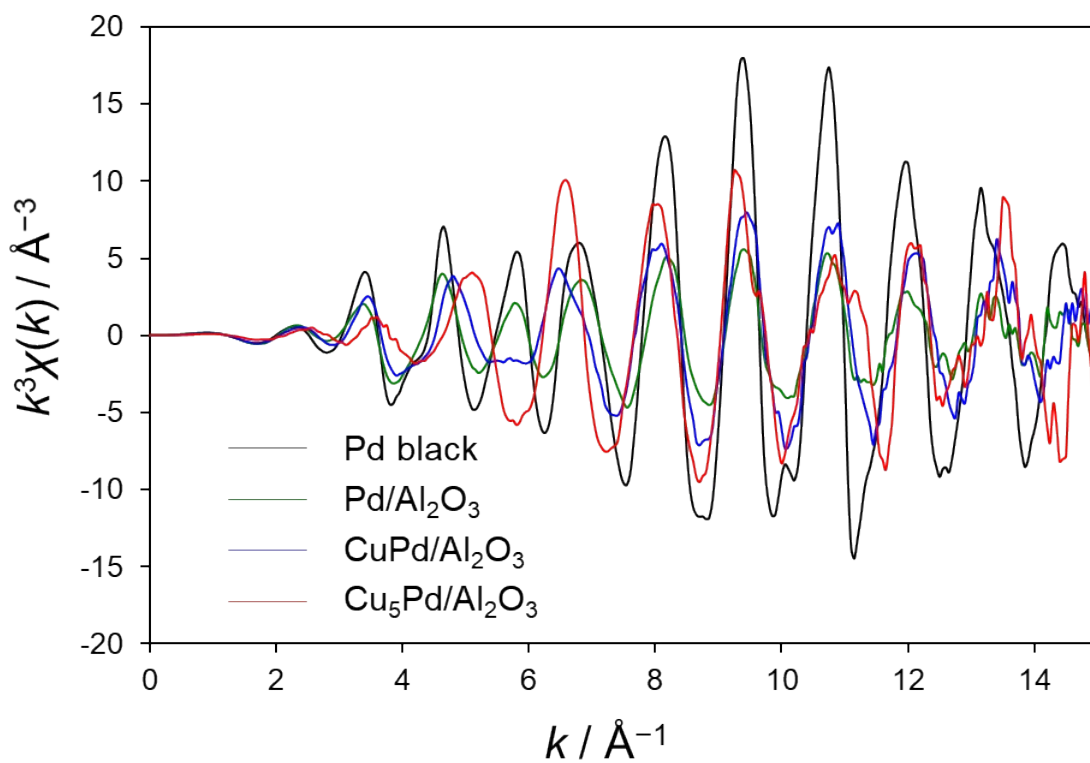

Figure S4. Pd K-edge  $k^3$ -weighted EXAFS oscillations of Pd-based catalysts.

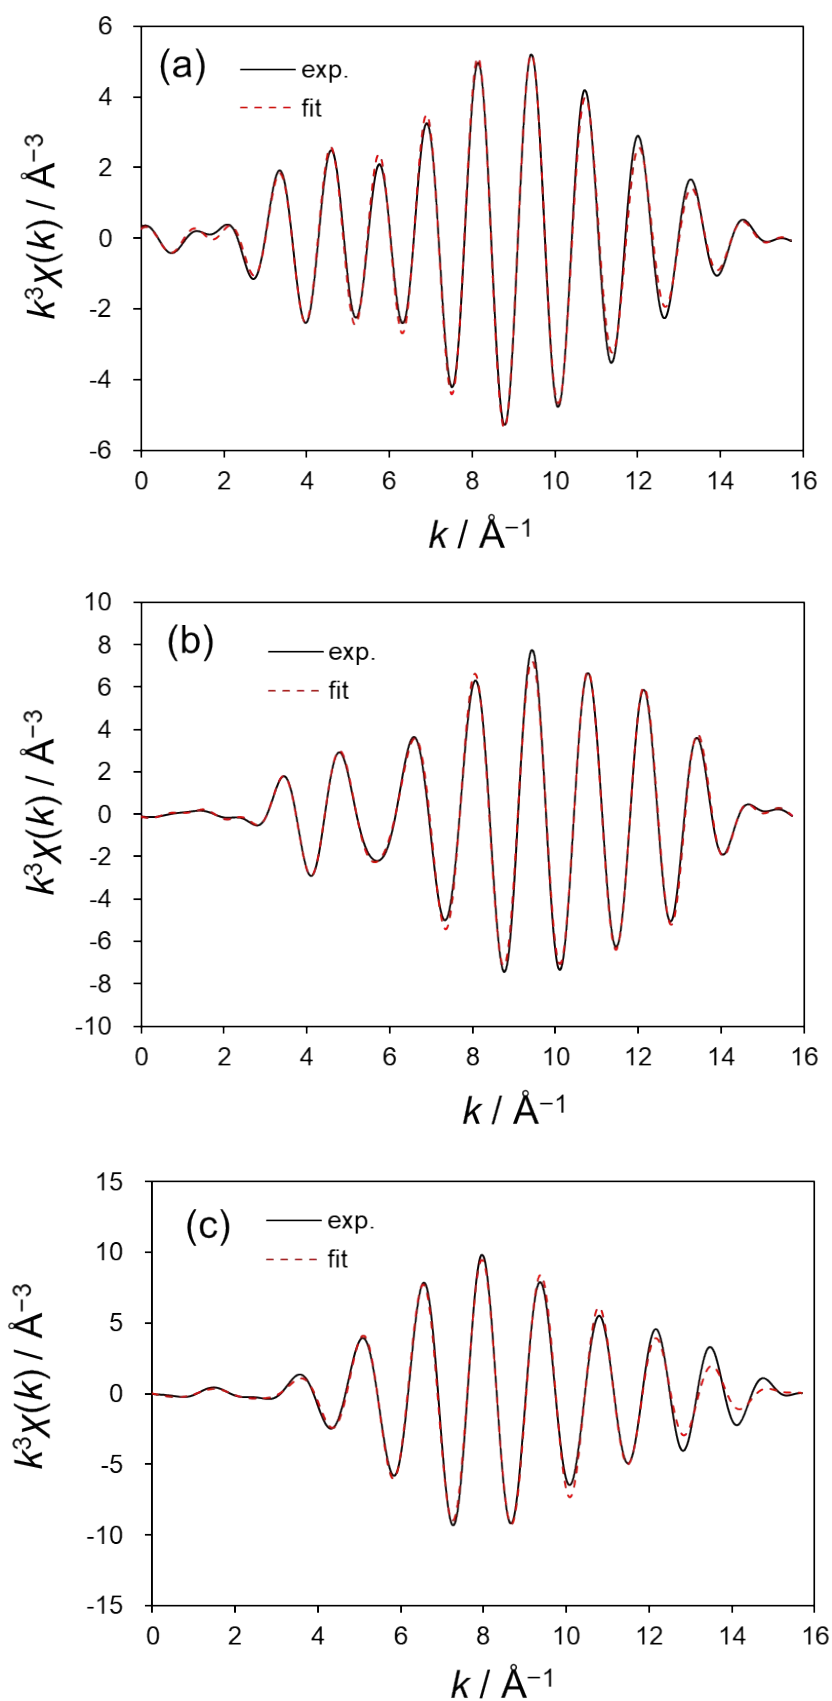

Figure S5. Fourier-filtered EXAFS oscillations (solid curve) and the curve fit (dashed line) for (a) Pd/Al<sub>2</sub>O<sub>3</sub>, (b) CuPd/Al<sub>2</sub>O<sub>3</sub>E, and (c) Cu<sub>5</sub>Pd/Al<sub>2</sub>O<sub>3</sub>.

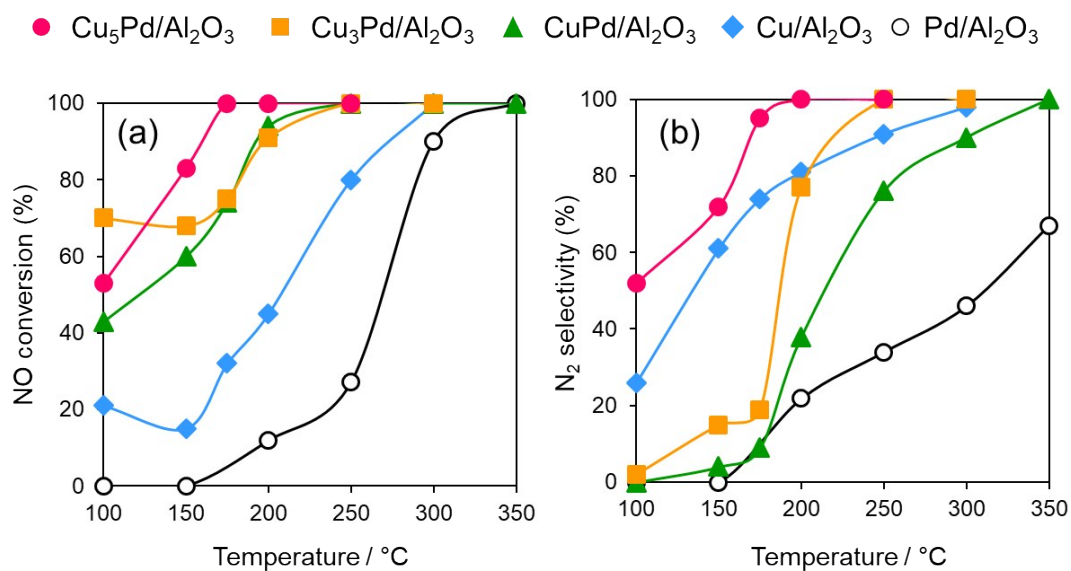

Figure S6. (a) NO conversion and (b) N<sub>2</sub> selectivity in NO+CO reaction over Pd/Al<sub>2</sub>O<sub>3</sub>, Cu/Al<sub>2</sub>O<sub>3</sub>, and Cu<sub>x</sub>Pd/Al<sub>2</sub>O<sub>3</sub> catalysts.

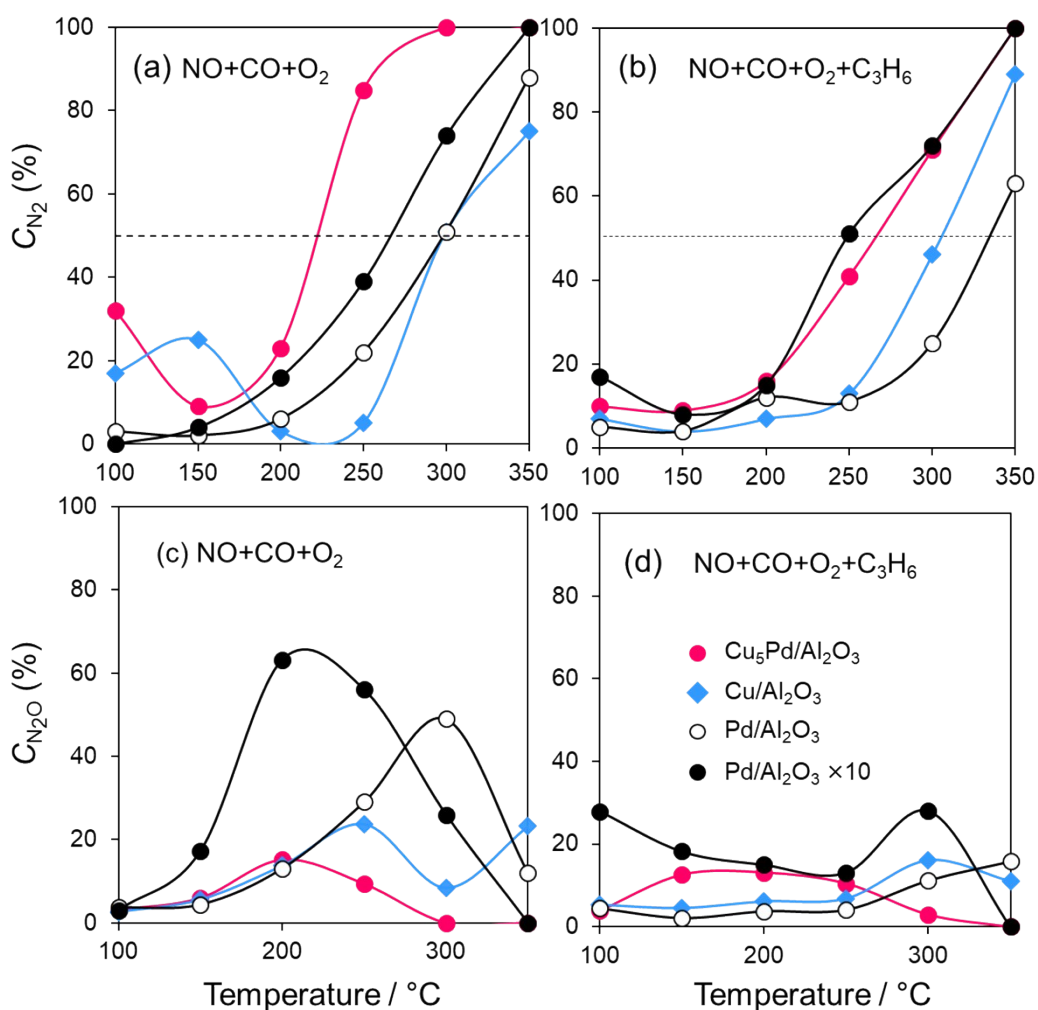

Figure S7. C<sub>N<sub>2</sub></sub> and C<sub>N<sub>2</sub>O</sub> in NO+CO+O<sub>2</sub> and NO+CO+O<sub>2</sub>+C<sub>3</sub>H<sub>6</sub> reactions over Cu<sub>5</sub>Pd/Al<sub>2</sub>O<sub>3</sub>, Cu/Al<sub>2</sub>O<sub>3</sub>, and Pd/Al<sub>2</sub>O<sub>3</sub> catalysts.

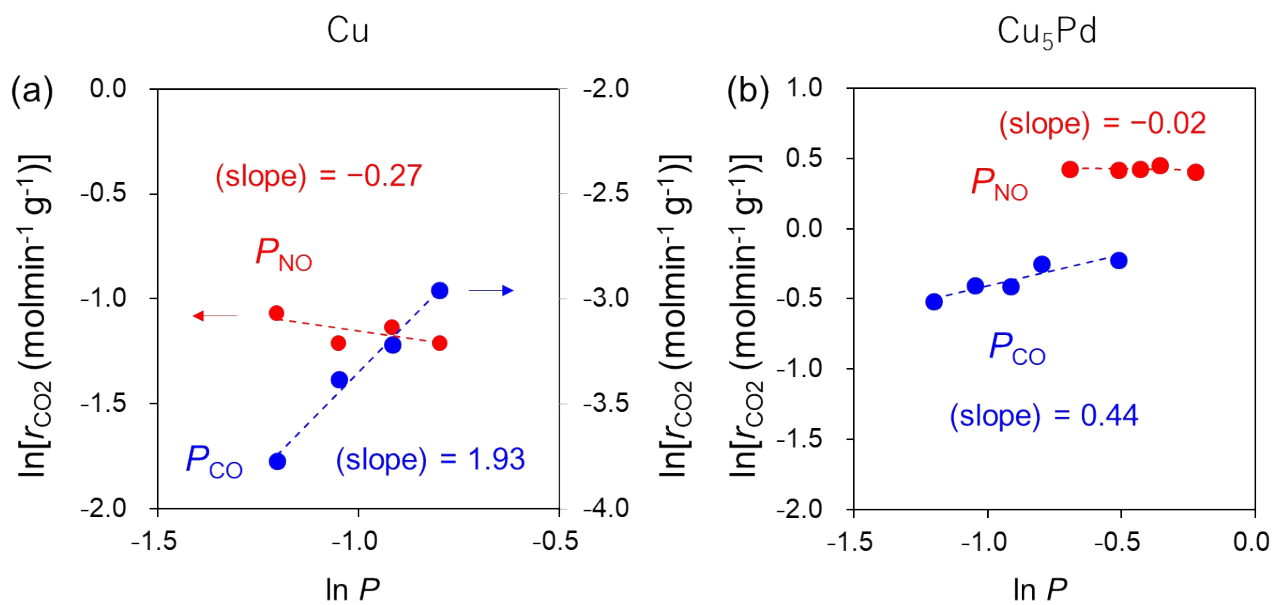

Figure S8 Dependence of reaction rate on NO and CO partial pressures ( $P_{\text{NO}}$  and  $P_{\text{CO}}$ , respectively) in NO reduction by CO over Cu/Al<sub>2</sub>O<sub>3</sub> and Cu<sub>5</sub>Pd/Al<sub>2</sub>O<sub>3</sub>.

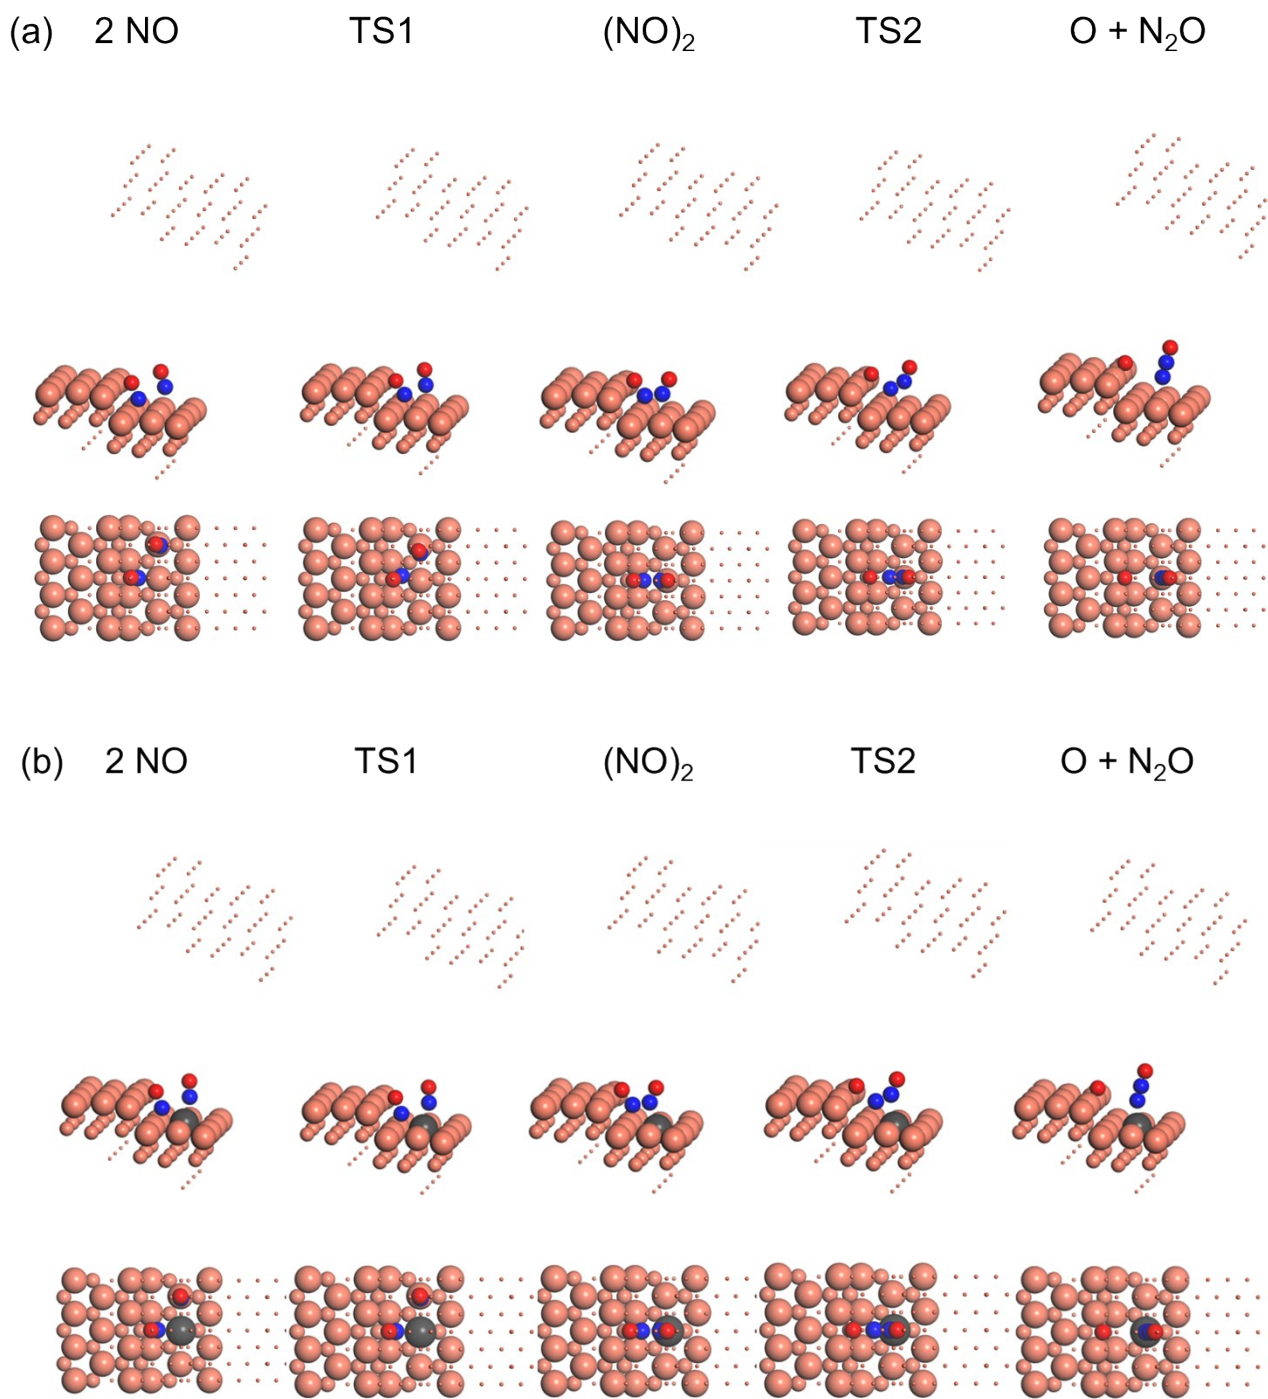

Figure S9. Optimized structures of adsorbates and the corresponding transition states during (NO)<sub>2</sub> dimer formation and its subsequent decomposition to N<sub>2</sub>O and O over (a) Cu(211) and (b) Pd - substituted Cu(211). For clarity, metal atoms in the sub-surface region are shown as small dots.



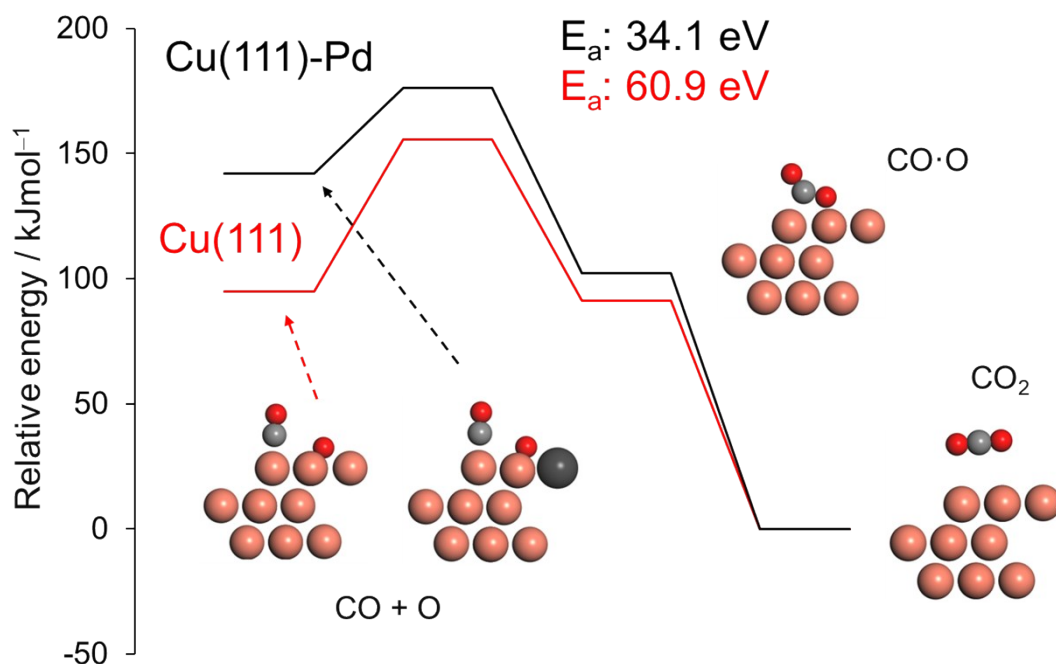

Figure S10. Energy diagrams of CO oxidation over Cu(111) and Pd-substituted Cu(111) surfaces. Total energy of the slab plus free CO<sub>2</sub> was set zero. TS search was performed with the intermediate structure (CO·O) as a tentative final state.

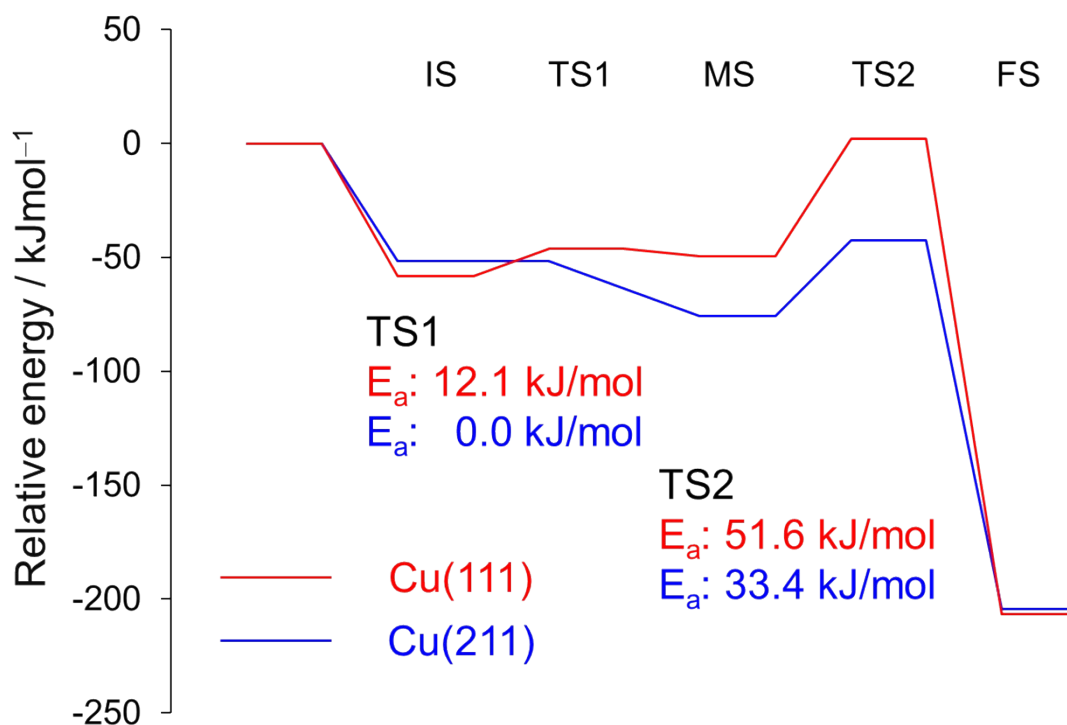

Figure S11. Energy diagrams of N<sub>2</sub>O bending (IS→MS) and its subsequent decomposition to N<sub>2</sub> and O (MS→FS) over (a) Cu(111) and (b) Cu(211) surfaces. For Cu(211), conversion from IS to MS was barrier-less. Total energy of slab and free N<sub>2</sub>O was set to zero.

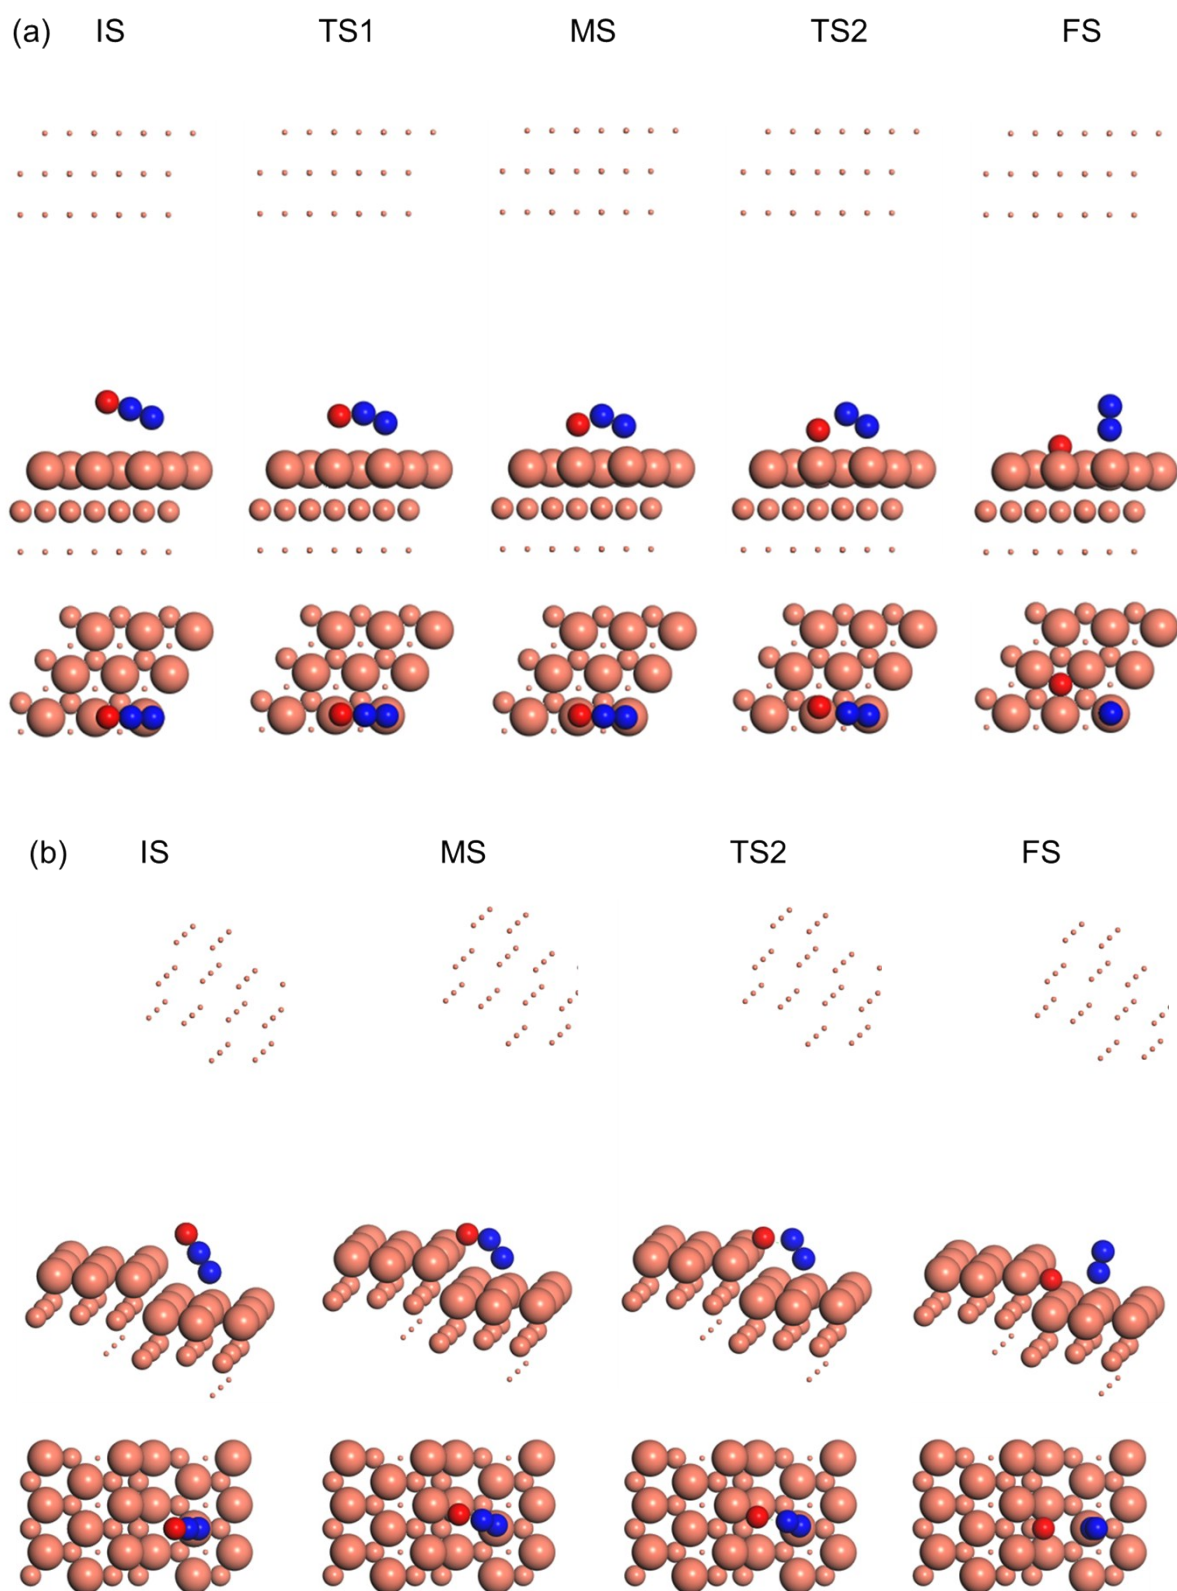

Figure S12. Optimized structures of adsorbates (IS, MS, and FS) and the corresponding transition states (TS1 and TS2) during N<sub>2</sub>O bending and its subsequent decomposition to N<sub>2</sub> and O over (a) Cu(111) and (b) Cu(211) surfaces. For clarity, metal atoms in the sub-surface region are shown as small dots.

## Kinetic Analysis

A Langmuir-Hinshelwood type mechanism

with an (NO)<sub>2</sub> dimer formation and decomposition was considered for NO–CO reaction over Cu-based catalysts as follows:

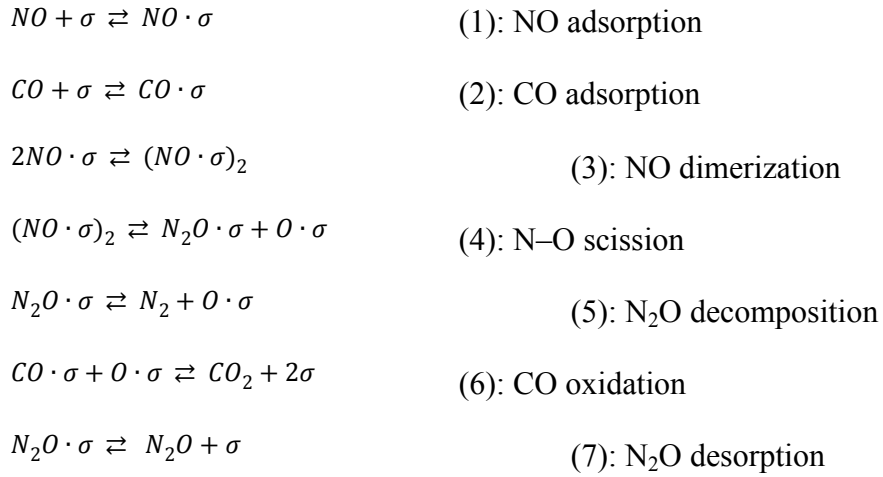

where,  $\sigma$  indicates an adsorption site. Each step can be regarded to be in equilibrium except when it is the rate-determining step. Therefore, the equilibrium constants are generally defined as follows:

$$\begin{aligned}
 K_1 &= \theta_{NO}/P_{NO}(1 - \theta) \\
 K_2 &= \theta_{CO}/P_{CO}(1 - \theta) \\
 K_3 &= \theta_{(NO)_2}/\theta_{NO}^2 \\
 K_4 &= \theta_{N_2O}\theta_O/\theta_{(NO)_2} \\
 K_5 &= P_{N_2}\theta_O/\theta_{N_2O} \\
 K_6 &= P_{CO_2}(1 - \theta)^2/\theta_{CO}\theta_O \\
 K_7 &= P_{N_2O}(1 - \theta)/\theta_{N_2O}
 \end{aligned}$$

where,  $P_X$ ,  $\theta_X$ , and  $1 - \theta$  are the partial pressure of  $X$ , coverage of  $X$ , and percentage of vacant site:

$1 - (\theta_{NO} + \theta_{CO} + \theta_{(NO)_2} + \theta_{N_2O} + \theta_O)$ , respectively.

Assuming that NO adsorption (1) is the rate determining step, the overall reaction rate can be expressed using a rate constant  $k$  as follows:

$$r = kP_{NO}(1 - \theta)$$

here,  $1 - \theta$  is expressed using the equilibrium constants and  $P_X$  as follows:

$$1 - \theta = \frac{-b \pm \sqrt{b^2 - 4ac}}{2a}$$

where, a, b, and c are expressed as follows:  $a = K_3^{-0.5}K_4^{-1.5}K_5^{1.5}K_7^{-2}P_{N_2}^{-1.5}P_{N_2O}^2$ ,  $c = -1$

$$b = K_7^{-1}P_{N_2O} \left( K_3^{-0.5}K_4^{-0.5}K_5^{0.5}P_{N_2}^{-0.5} + K_5^{-1}K_6^{-1}K_7^2P_{CO_2}P_{N_2}P_{N_2O}^{-2} + K_3P_{N_2}^{-1} + 1 \right) + 1$$

Based on these, the reaction orders for  $P_{NO}(x)$  and  $P_{CO}(y)$  on the overall reaction rate should be described as follows:  $x = 1, y = 0$ .

This indicates the first- and zero-order dependences of  $r$  on  $P_{NO}$  and  $P_{CO}$ , respectively. This does not agree with the experimental results.

Assuming that CO adsorption (2) is the rate determining step, the overall reaction rate can be expressed using a rate constant  $k$  as follows:

$$r = kP_{CO}(1 - \theta)$$

here,  $1 - \theta$  is expressed using the equilibrium constants and  $P_X$  as follows:

$$1 - \theta = \frac{-b \pm \sqrt{b^2 - 4ac}}{2a}$$

where, a, b, and c are expressed those shown in the solution for (1).

Based on these, the reaction orders for  $P_{NO}(x)$  and  $P_{CO}(y)$  on the overall reaction rate should be described as follows:  $x = 0, y = 1$ .

This indicates the zero- and first-order dependences of  $r$  on  $P_{NO}$  and  $P_{CO}$ , respectively, which is inconsistent with the experimental results.

Next, we assume that NO dimerization (3) is the rate determining step: the overall reaction rate can be expressed using a rate constant  $k$  as follows:

$$r = kK_1P_{NO}^2(1 - \theta)^2$$

here,  $1 - \theta$  is expressed using the equilibrium constants and  $P_X$  as follows:

$$1 - \theta = \frac{-b \pm \sqrt{b^2 - 4ac}}{2a}$$

where, a, b, and c are expressed as follows:  $a = K_4^{-1}K_5K_7^{-2}P_{N_2}^{-1}P_{N_2O}^2$

$$b = K_1P_{NO} + K_2P_{CO} + K_7^{-1}P_{N_2O}(K_5P_{N_2}^{-1} + 1) + 1 \quad c = -1$$

Based on these, the ranges of the reaction orders for  $P_{NO}(x)$  and  $P_{CO}(y)$  on the overall reaction rate should be as follows:  $2 < x < 4$ ,  $0 < y < 2$ . This does not agree with the experimental results with negative  $x$ .

Assuming that N–O bond scission of (NO)<sub>2</sub> dimer (4) is the rate determining step, the overall reaction rate can be expressed using a rate constant  $k$  as follows:

$$r = kK_1^2K_3P_{NO}^2(1 - \theta)^2$$

here,  $1 - \theta$  is expressed using the equilibrium constants and  $P_X$  as follows:

$$1 - \theta = \frac{-b \pm \sqrt{b^2 - 4ac}}{2a}$$

where, a, b, and c are expressed as follows:  $a = K_1^2K_3P_{NO}^2$

$$b = K_1P_{NO} + K_2P_{CO} + K_7^{-1}P_{N_2O}(K_5P_{N_2}^{-1} + 1) + 1 \quad c = -1$$

Based on these, the ranges of the reaction orders for  $P_{NO}(x)$  and  $P_{CO}(y)$  on the overall reaction rate should be as follows:  $-2 < x < 0$ ,  $0 < y < 2$ , which is well consistent with the experimental orders for both Cu/Al<sub>2</sub>O<sub>3</sub> and Cu<sub>5</sub>Pd/Al<sub>2</sub>O<sub>3</sub>.

Then, we assume that N<sub>2</sub>O decomposition (5) is the rate determining step, affording the overall reaction rate expressed as follows:

$$r = kK_7^{-1}P_{N_2O}(1 - \theta)$$

here,  $1 - \theta$  is expressed using the equilibrium constants and  $P_X$  as follows:

$$1 - \theta = \frac{-b \pm \sqrt{b^2 - 4ac}}{2a}$$

where, a, b, and c are expressed as follows:  $a = K_2^{-1}K_4^{-1}K_6^{-1}K_7^{-1}P_{N_2O}P_{CO_2}P_{CO}^{-1}$

$$b = K_1P_{NO} + K_2P_{CO} + K_7^{-1}P_{N_2O}(K_5P_{N_2}^{-1} + 1) + 1 \quad c = -1$$

Based on these, the ranges of the reaction orders for  $P_{NO}(x)$  and  $P_{CO}(y)$  on the overall reaction rate should be as follows:  $0 < x < 1$ ,  $0 < y < 2$ , which is inconsistent with the experimental results with negative  $x$ .

When CO oxidation (6) is assumed as the rate determining step, the overall reaction rate is expressed as follows:

$$r = kK_2K_5K_7^{-1}P_{N_2}^{-1}P_{N_2O}P_{CO}(1 - \theta)^2$$

here,  $1 - \theta$  is expressed using the equilibrium constants and  $P_X$  as follows:

$$1 - \theta = \frac{-b \pm \sqrt{b^2 - 4ac}}{2a}$$

where, a, b, and c are expressed those shown in the solution for (3).

Based on these, the ranges of the reaction orders for  $P_{NO}(x)$  and  $P_{CO}(y)$  on the overall reaction rate should be as follows:  $0 < x < 2$ ,  $1 < y < 3$ . This does not agree with the experimental results.

When  $N_2O$  desorption (7) is assumed as the rate determining step, the overall reaction rate is expressed as follows:

$$r = kK_2^{-1}K_5^{-1}K_6^{-1}P_{N_2}P_{CO_2}P_{CO}^{-1}(1 - \theta)$$

here,  $1 - \theta$  is expressed using the equilibrium constants and  $P_X$  as follows:

$$1 - \theta = \frac{-b \pm \sqrt{b^2 - 4ac}}{2a}$$

where, a, b, and c are expressed as follows:  $a = K_2^{-1}K_4^{-1}K_5^{-1}K_6^{-1}P_{N_2}P_{CO_2}^2P_{CO}^{-2}$

$$b = K_1P_{NO} + K_2P_{CO} + K_2^{-1}K_6^{-1}P_{CO_2}(K_5^{-1}P_{N_2} + 1)P_{CO}^{-1} + 1 \quad c = -1$$

Based on these, the ranges of the reaction orders for  $P_{NO}(x)$  and  $P_{CO}(y)$  on the overall reaction rate should be as follows:  $0 < x < 1$ ,  $1 < y < 3$ . This does not agree with the experimental results.

Thus, assuming N–O bond scission of  $(NO)_2$  dimer (4) as the rate-determining step exclusively gave the reaction order ranges consistent with the experiment. On the basis of these results, we concluded that the rate-determining step of NO–CO reaction over Cu-based catalysts is N–O bond scission of  $(NO)_2$  dimer.

Appendix Table 1. Summary of reaction orders

| RDS in NO–CO | $r = kP_{NO}^xP_{CO}^y$ |              |
|--------------|-------------------------|--------------|
| (1)          | $x = 1$                 | $y = 0$      |
| (2)          | $x = 0$                 | $y = 1$      |
| (3)          | $2 < x < 4$             | $0 < y < -2$ |
| (4)          | $-2 < x < 0$            | $0 < y < 2$  |

|     |             |             |
|-----|-------------|-------------|
| (5) | $0 < x < 1$ | $0 < y < 2$ |
| (6) | $0 < x < 2$ | $1 < y < 3$ |
| (7) | $0 < x < 1$ | $1 < y < 3$ |

---
